# Supplementary material for: The DNA binding landscape of the maize AUXIN RESPONSE FACTOR family
Source: PubMed Central journal article supplement (PMC6207667; doi:10.1038/s41467-018-06977-6), 2018-10-30
Supplement: 41467_2018_6977_MOESM1_ESM.pdf [file 41467_2018_6977_MOESM1_ESM.pdf]

**THE DNA BINDING LANDSCAPE OF THE MAIZE AUXIN RESPONSE  
FACTOR FAMILY**

**Galli et al.**

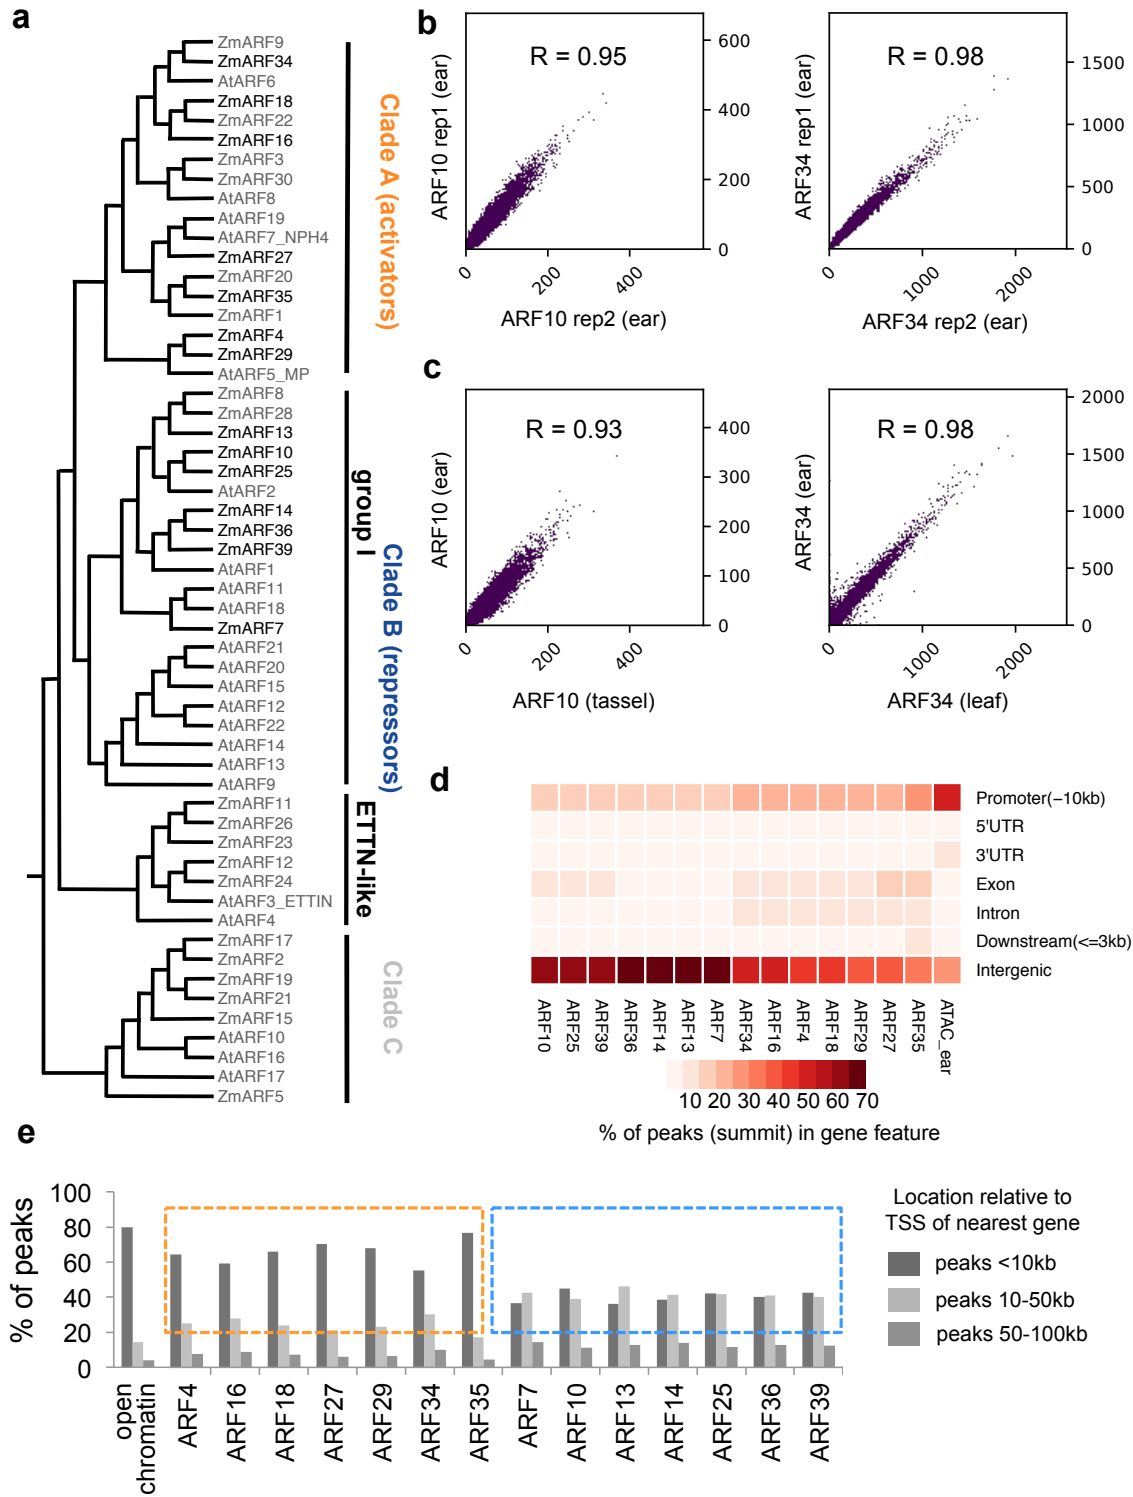

**Supplementary Figure 1. ARF DAP-seq peaks are reproducible and located throughout the genome.** **a.** Neighbor joining cladogram based on percent amino acid identity of the 33 expressed maize ARFs (ZmARF) and 22 Arabidopsis ARFs (AtARF). ZmARFs presented in this study are in bold. **b.** Scatterplots showing correlation between replicate DAP-seq experiments for three different ARFs. **c.** Scatterplots showing correlation between replicate DAP-seq experiments performed with genomic DNA from different tissues. **d.** Percentage of peaks that are located within 10kb, 10-50kb, and 50-100kb of a gene body. Clade A ARFs are boxed in orange, clade B ARFs are boxed in blue. Open chromatin dataset corresponds to the ear ATAC-seq dataset. **e.** Heatmap showing percentage of peaks from each ARF dataset that are found in different genomic features. Promoter is defined as 10kb upstream of the TSS. Downstream is defined as 3kb downstream of the transcription termination site.

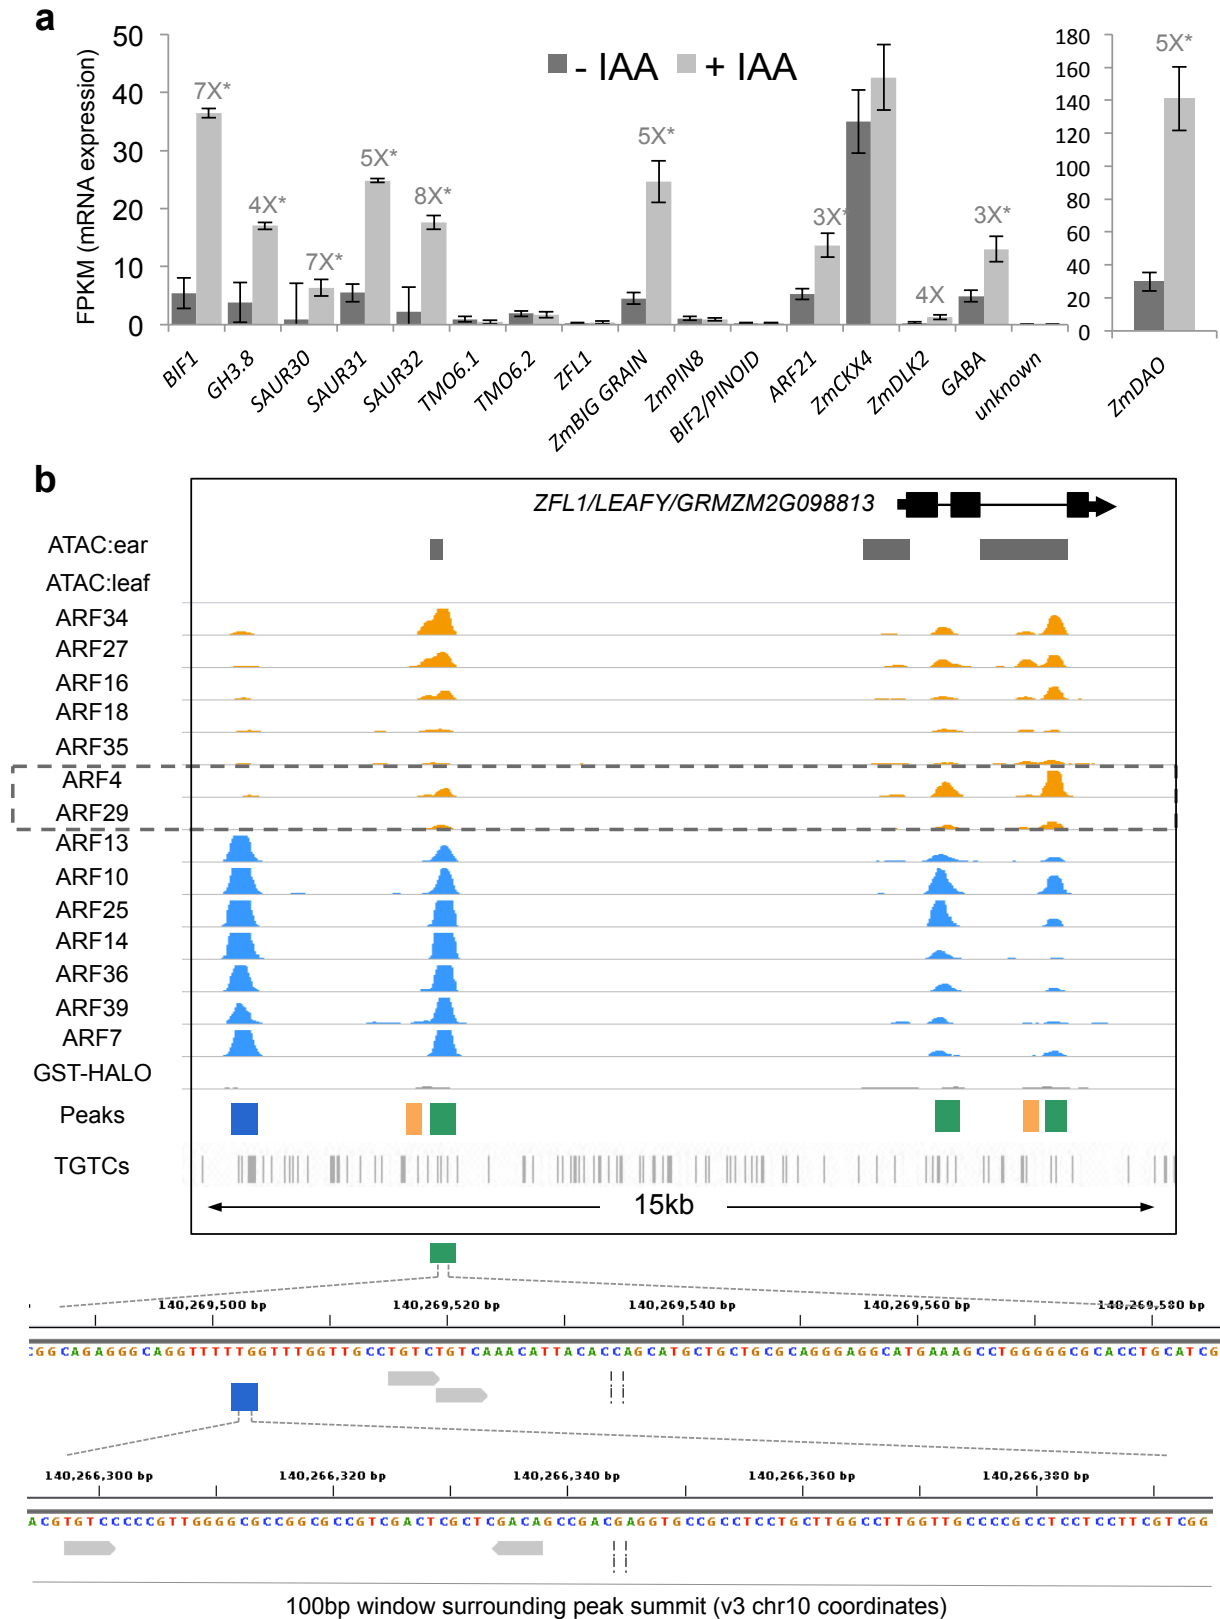

**Supplementary Figure 2. ARF target genes include auxin regulated genes. a.** mRNA expression values (FPKM) of mock treated (dark gray) or auxin induced (light gray) samples for selected genes shown in genome browser screenshots. Fold change values are indicated. Asterisk represents a FDR < 0.05. Error bars = s.d. **b.** Genome browser screenshots of ARF peaks at the *ZEAFLORECAULA1* (*ZFL1*) locus, the maize co-ortholog of Arabidopsis *LEAFY*. Bottom panels show sequence view of 100bp region surrounding peak summit. TGTC motifs present in the 100bp region are shown as gray bars. Clade A peaks, orange; clade B peaks, blue. Peaks track shows peaks called by GEM. Gray vertical lines in TGTCs track mark TGTC instances. Regions of accessible chromatin in immature ears and young leaves as determined by ATAC-seq are depicted as gray bars.

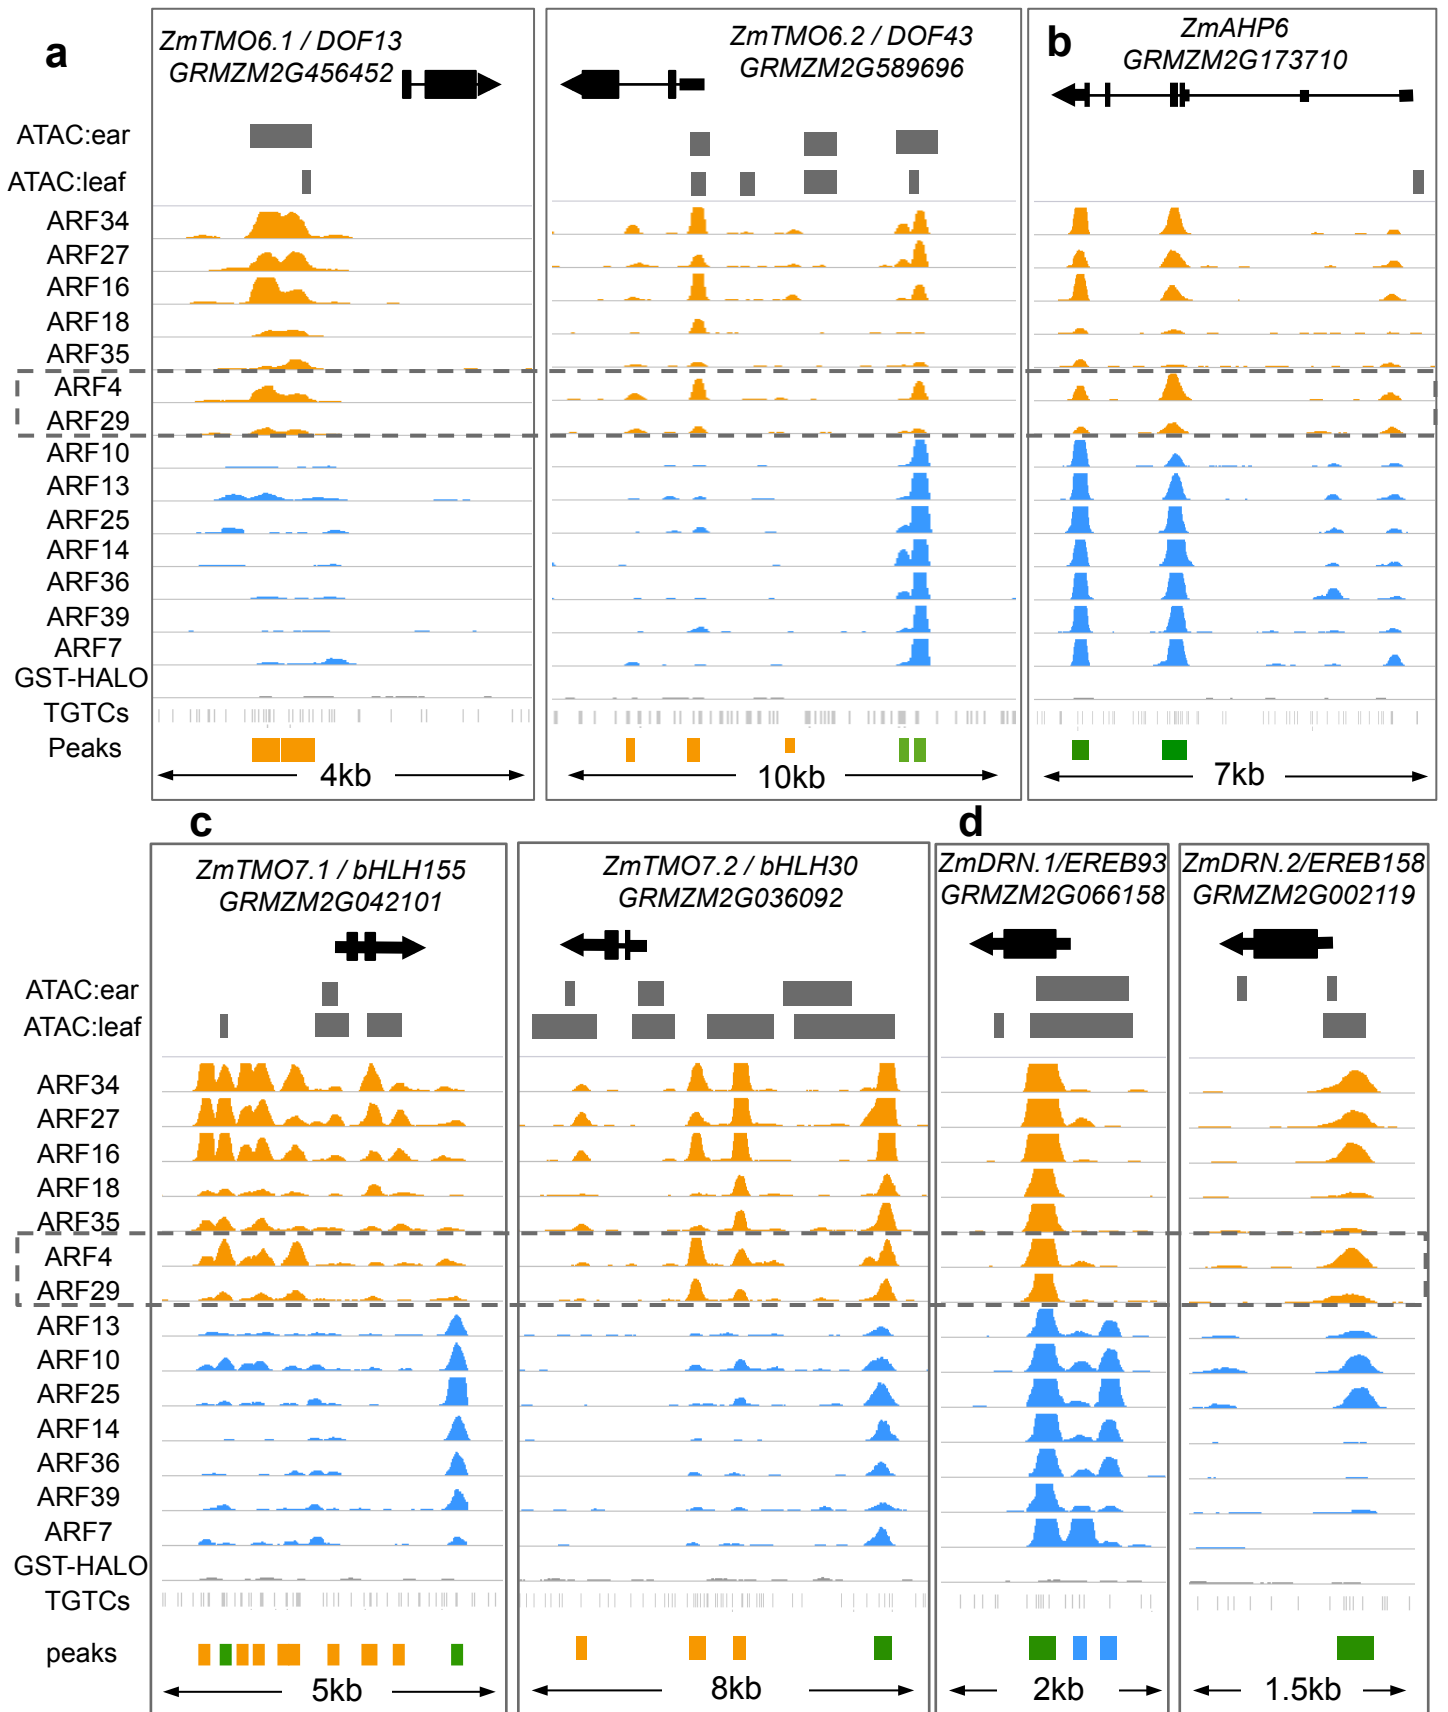

**Supplementary Figure 3. Conserved ARF target genes.** **a.** ARFs bind maize homologs of *TARGET OF MONOPTEROS6 (TMO6)*. ARF4 and ARF29 (dashed gray box) are the maize co-orthologs of MP. **b.** Maize homolog of *AtAHP6* **c.** Two maize homologs of *TARGET OF MONOPTEROS7 (TMO7)* **d.** Two maize homologs of *DORNROSCHEN (DRN)*. Clade A peaks, orange; clade B peaks, blue. Peaks track shows peaks called by GEM. Gray vertical lines in TGTCs track mark TGTC instances. Regions of accessible chromatin in immature ears and young leaves as determined by ATAC-seq are depicted as gray bars.

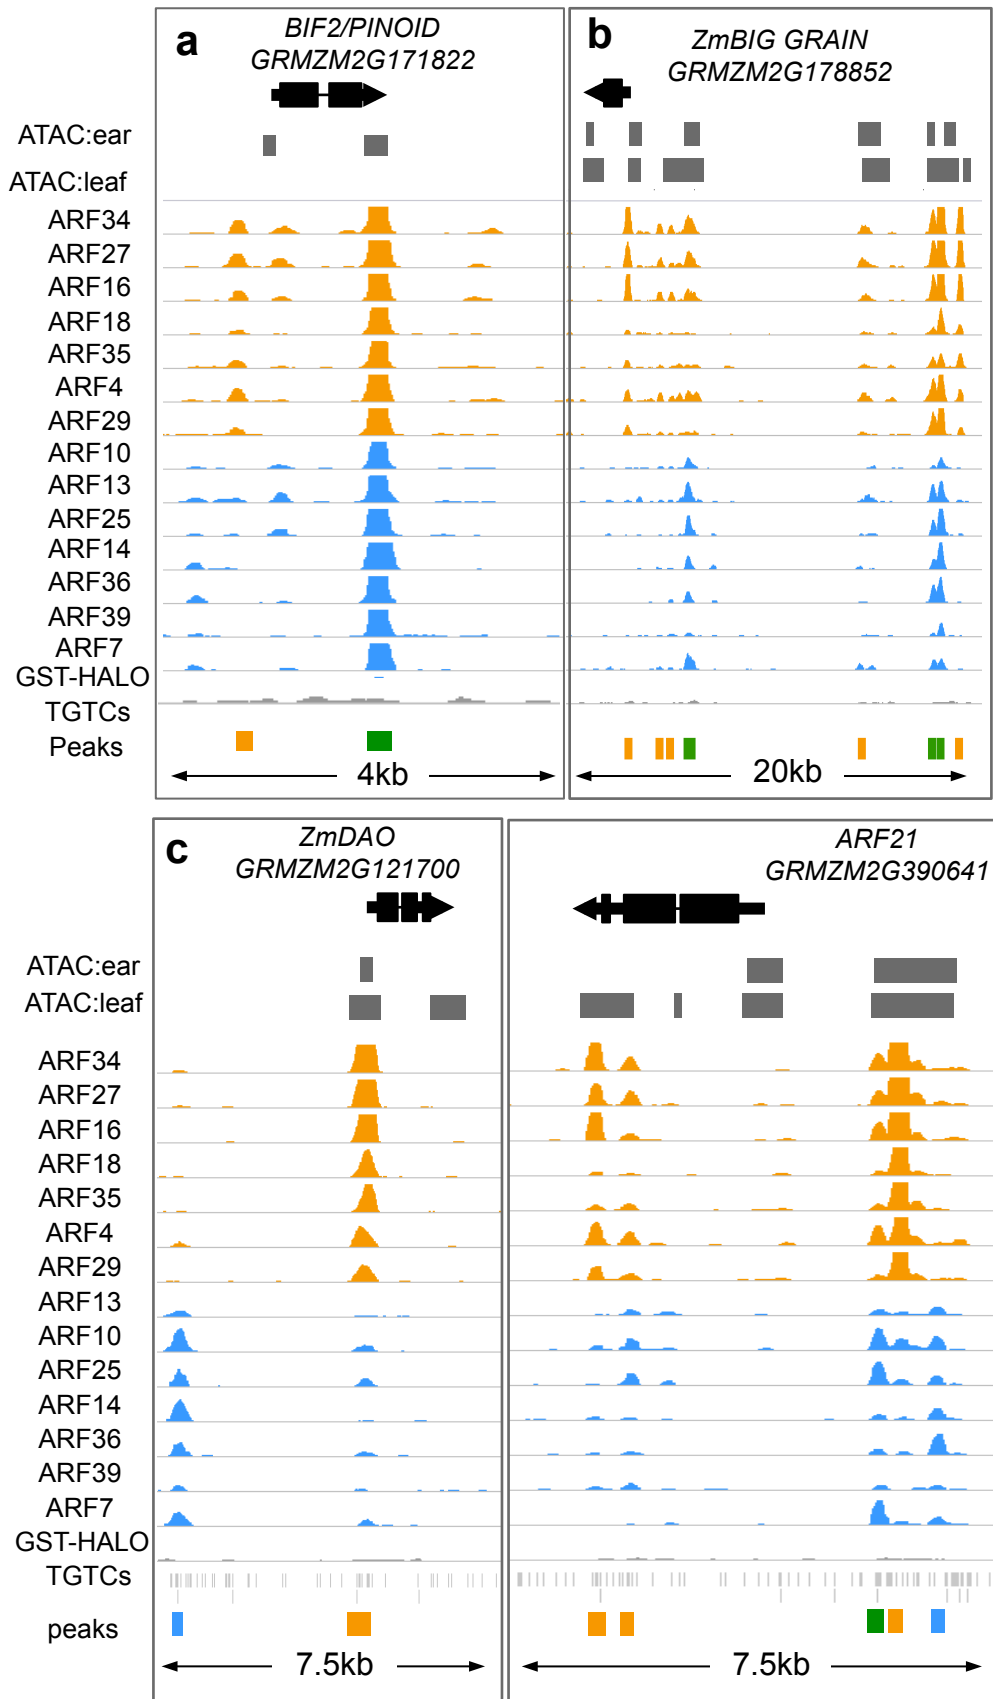

**Supplementary Figure 4. ARF target genes include auxin related genes.** **a.** The *BIF2/PINOID* locus involved in polar auxin transport. **b.** An auxin transport-related gene locus, the maize homolog of the rice *BIG GRAIN1*. **c.** Two auxin related genes not known to be directly bound by ARFs. Clade A peaks, orange; clade B peaks, blue. Peaks track shows peaks called by GEM. Gray vertical lines in TGTCs track mark TGTC instances. Regions of accessible chromatin in immature ears and young leaves as determined by ATAC-seq are depicted as gray bars.

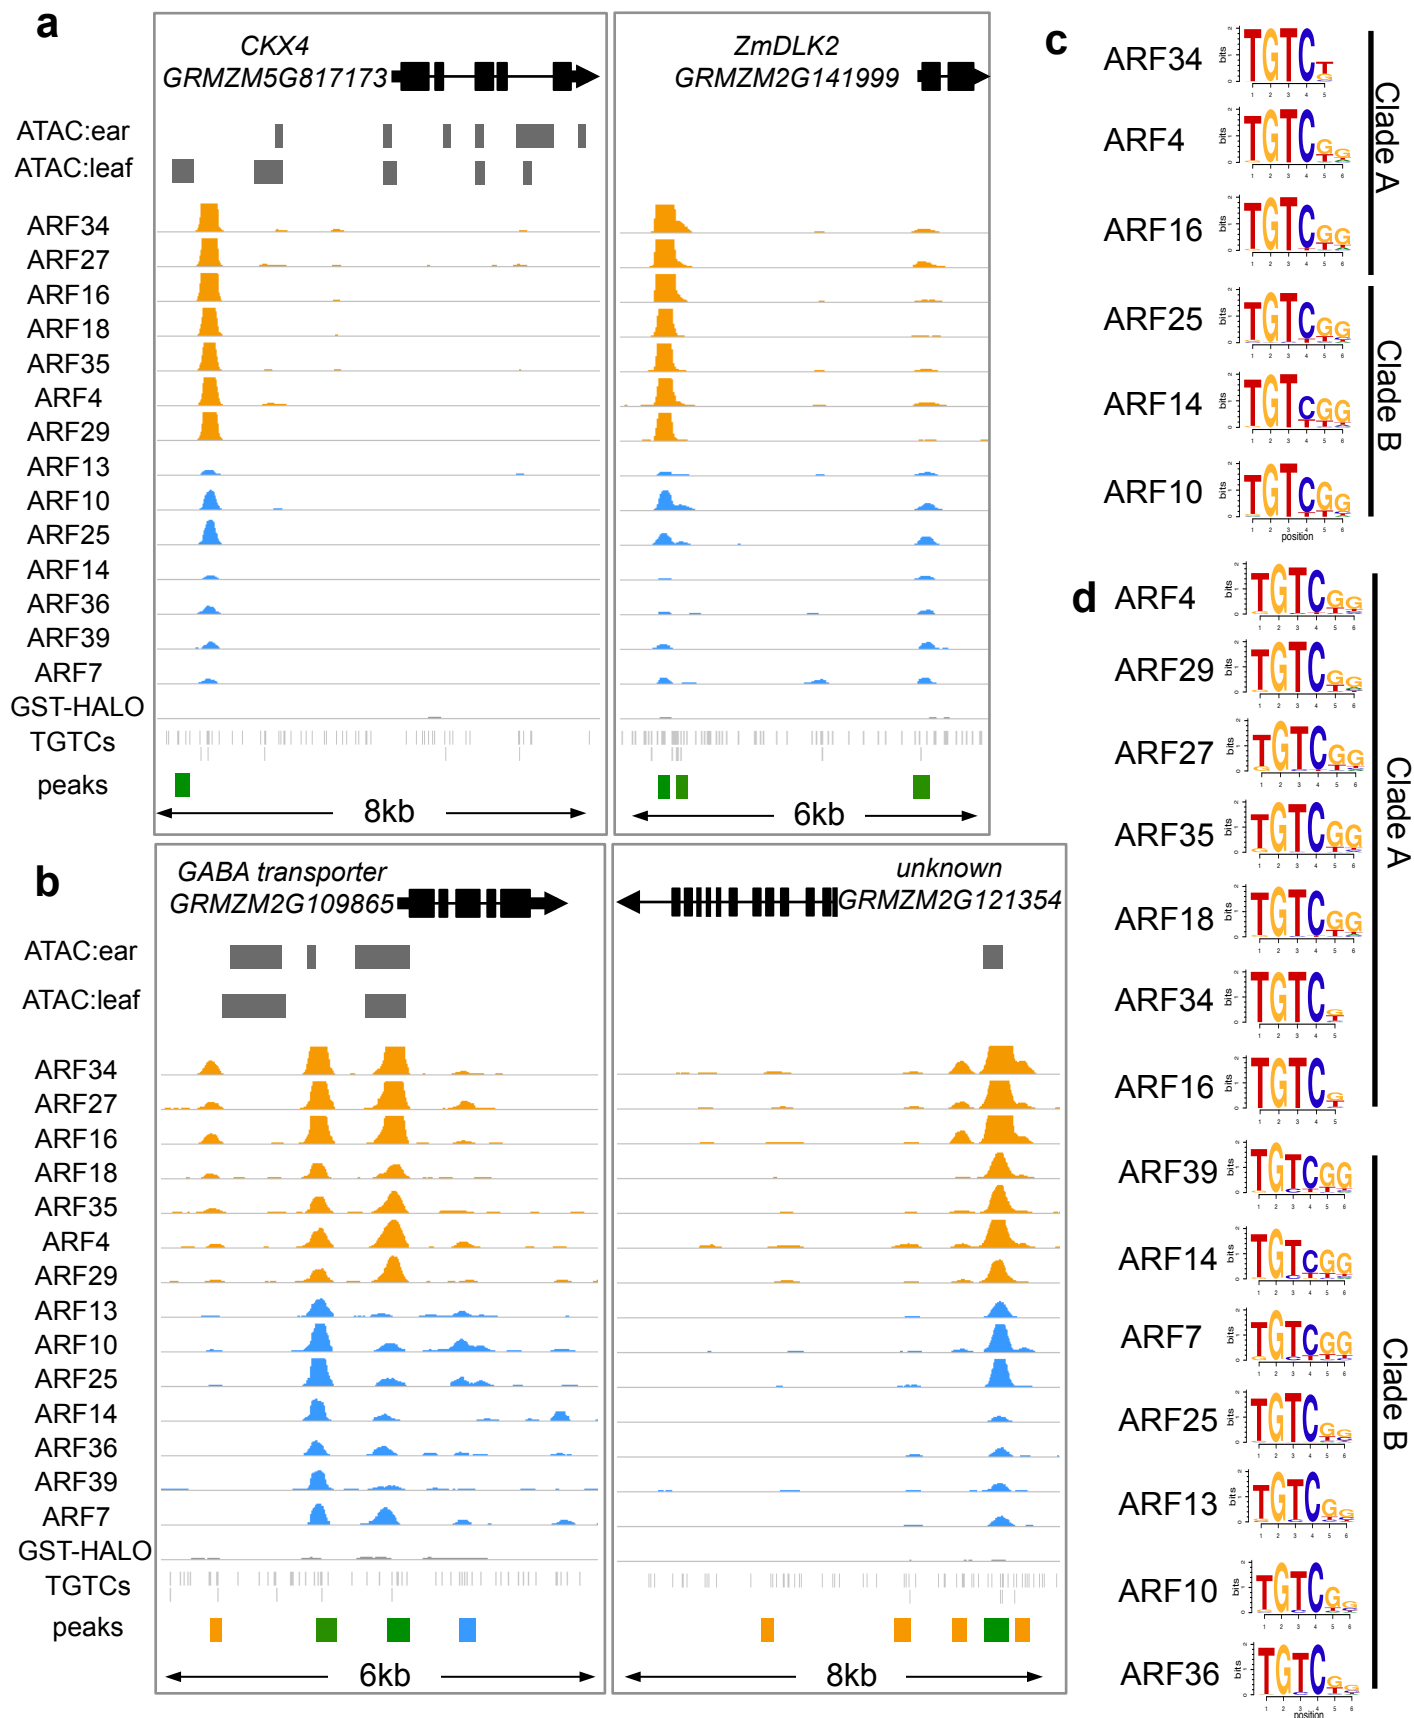

**Supplementary Figure 5.** **a.** Two hormone related genes bound by ARFs. **b.** Two uncharacterized genes bound by ARFs. Clade A peaks, orange; clade B peaks, blue. Peaks track shows peaks called by GEM. Gray vertical lines in TGTC instances track mark TGTC instances. Regions of accessible chromatin in immature ears and young leaves as determined by ATAC-seq are depicted as gray bars. **c.** Most enriched motif from Arabidopsis genomic DNA bound by maize ARFs. **d.** Most enriched motif in maize genomic DNA when only reads mapping to unique locations are used.

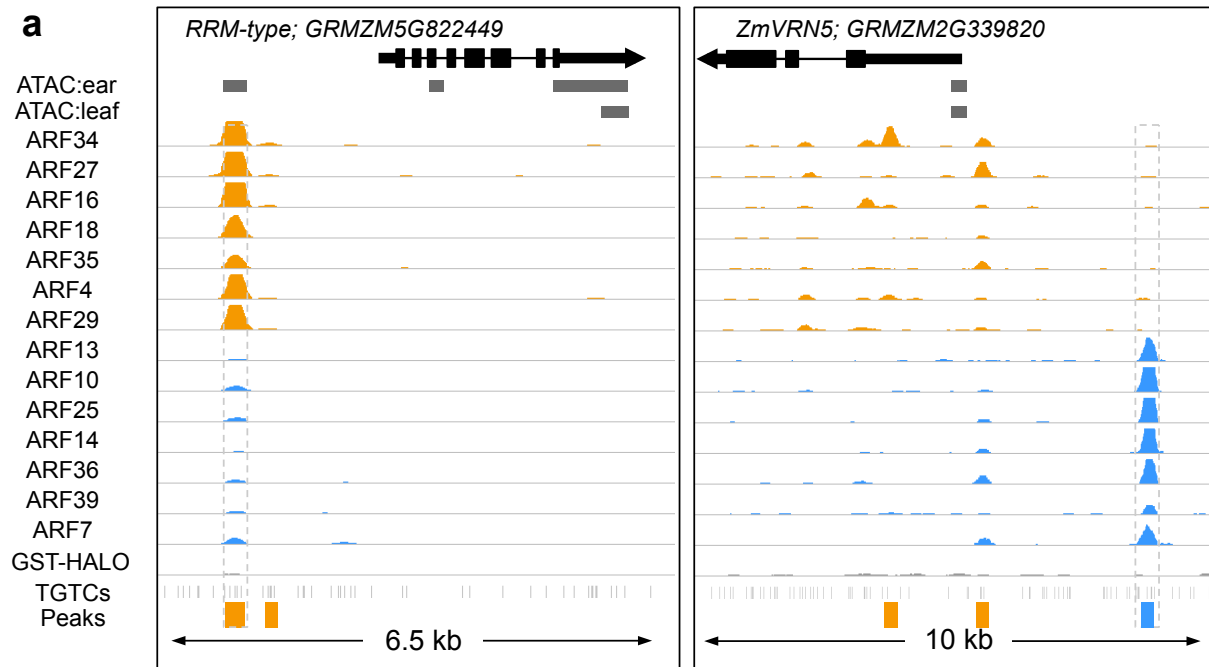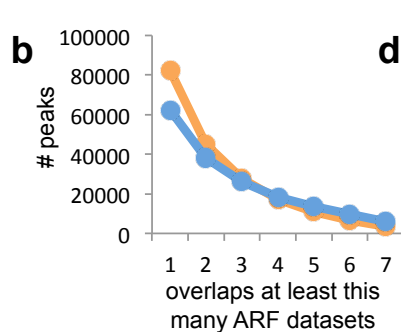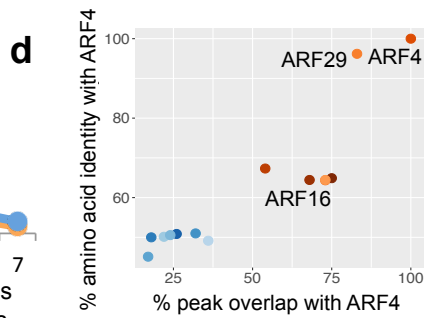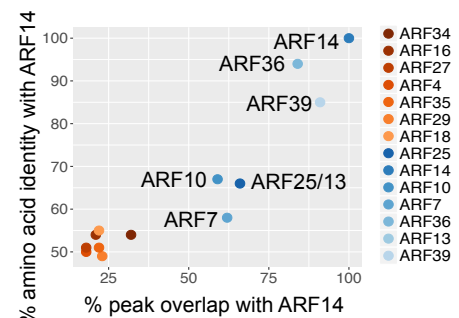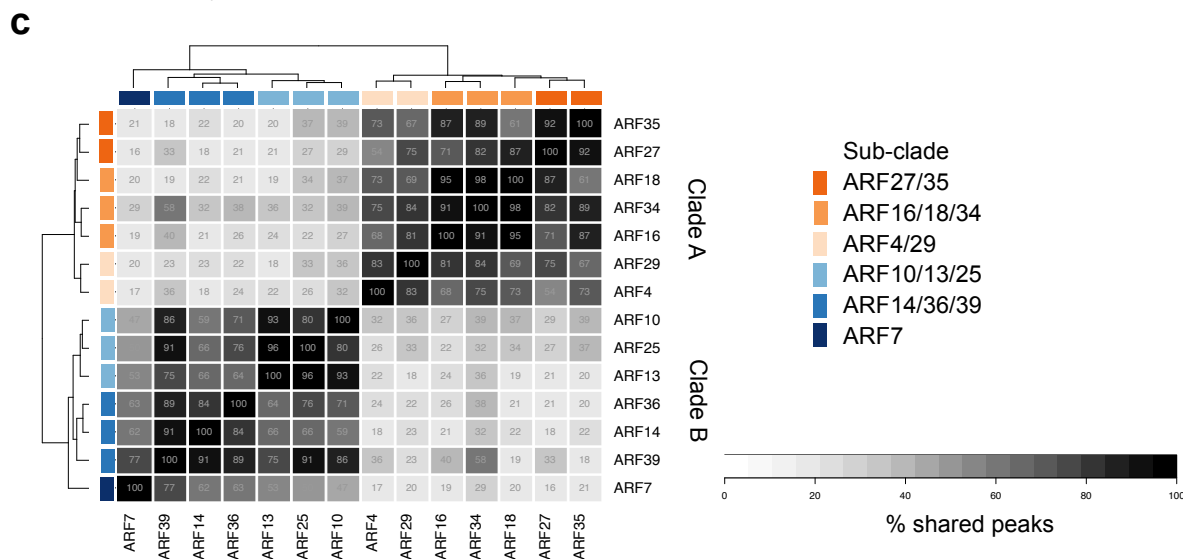

**Supplementary Figure 6. Shared and unique features of ARF binding.** **a.** Genome browser screenshot showing example of clade A-only peaks (left panel, orange) and clade B-only peaks (right panel, blue) at the *GRMZM5G822449* and *ZmVRN5* (*GRMZM2G339820*) loci. **b.** Number of unique peaks found in each of the seven clade A (orange) and clade B (blue) datasets as determined by DiffBind. **c.** Heatmap showing percentage of direct peak overlap between each ARF dataset. **d.** Scatterplots showing relationship between percent amino acid identity and percent peak overlap with ARF4 (clade A; left) and ARF14 (clade B; right).

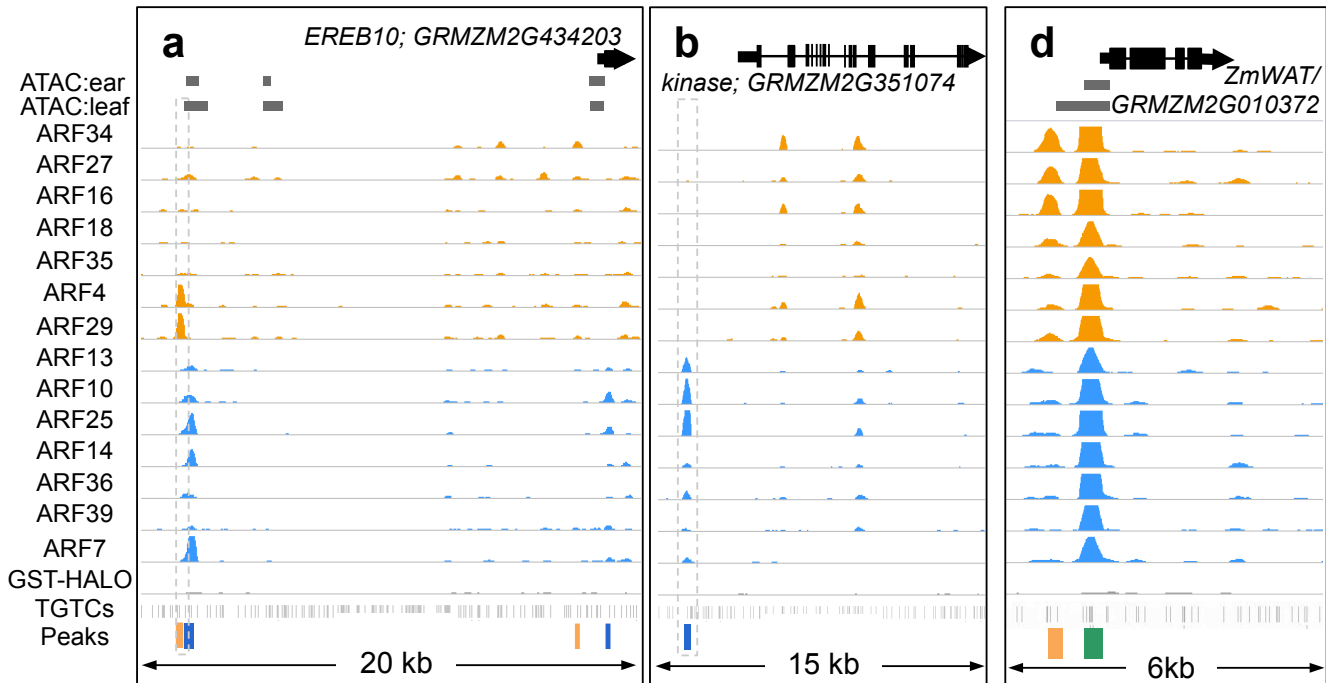

| c | sub-clade                    | class | # sub-clade specific peaks | % total peaks (124,530) |  | top motif | E score   |
|---|------------------------------|-------|----------------------------|-------------------------|--|-----------|-----------|
|   | ARF4, ARF29 (AtMP)           | A     | 519                        | 0.4%                    |  |           | 1.5e-070  |
|   | ARF16, ARF18, ARF34 (AtARF6) | A     | 9516                       | 7.6%                    |  |           | 1.2e-1118 |
|   | ARF27, ARF35 (AtNPH4)        | A     | 119                        | 0.1%                    |  |           | 9.7e-027  |
|   | ARF14, ARF36, ARF39 (AtARF1) | B     | 1047                       | 0.8%                    |  |           | 2.9e-045  |
|   | ARF10, ARF13, ARF25 (AtARF2) | B     | 6717                       | 5.4%                    |  |           | 2.6e-1371 |
|   | ARF7 (AtARF18)               | B     | 8120                       | 6.5%                    |  |           | 9.7e-264  |

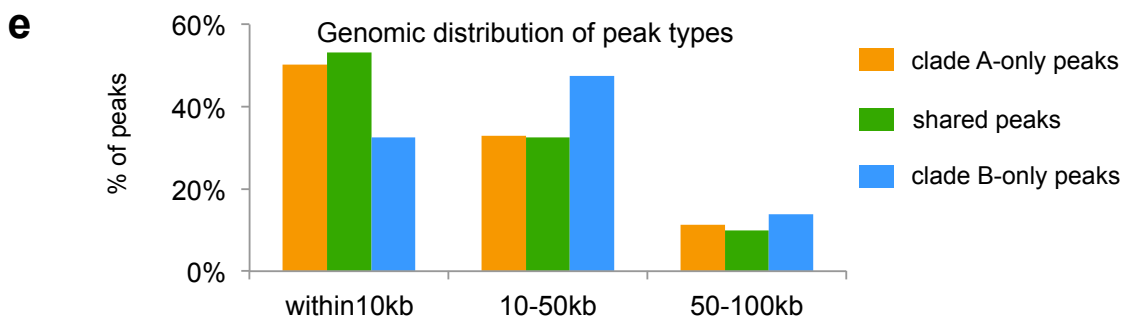

**Supplementary Figure 7. Sub-clade specificity.** **a.** Genome browser screenshot showing an ARF4 and ARF29 sub-clade specific peak (orange) at the *EREB10* locus. **b.** An ARF10, ARF13, ARF25 clade-specific peak (blue) at the *GRMZM2G351074* locus encoding an uncharacterized kinase. **c.** Table showing number of sub-clade specific peaks and results of motif enrichment analysis. The closest Arabidopsis homolog is indicated for each maize sub-clade. **d.** Genome browser screenshot showing shared peak at the maize *WALLS ARE THIN* (*ZmWAT7*) locus. **e.** Percentage of clade A-only, clade B-only and shared peaks that are located within 10kb, 10-50kb, and 50-100kb of a gene body.



a

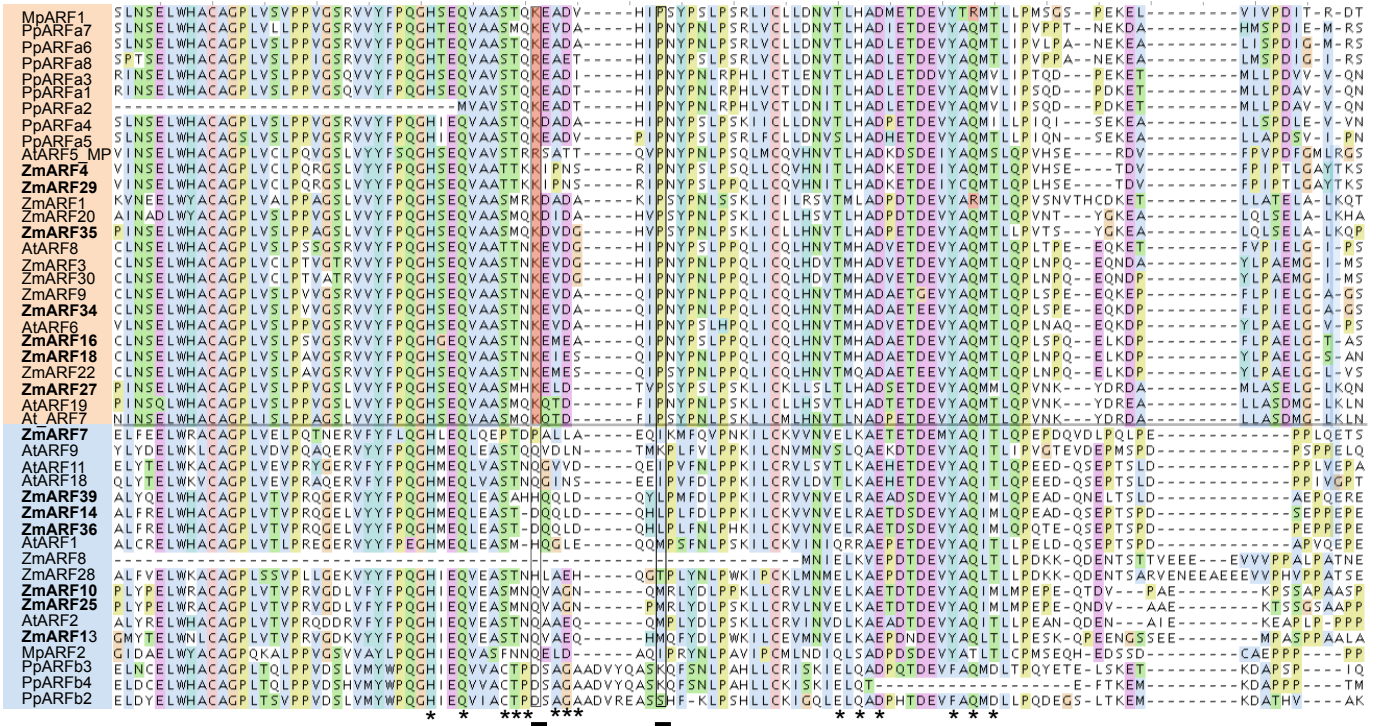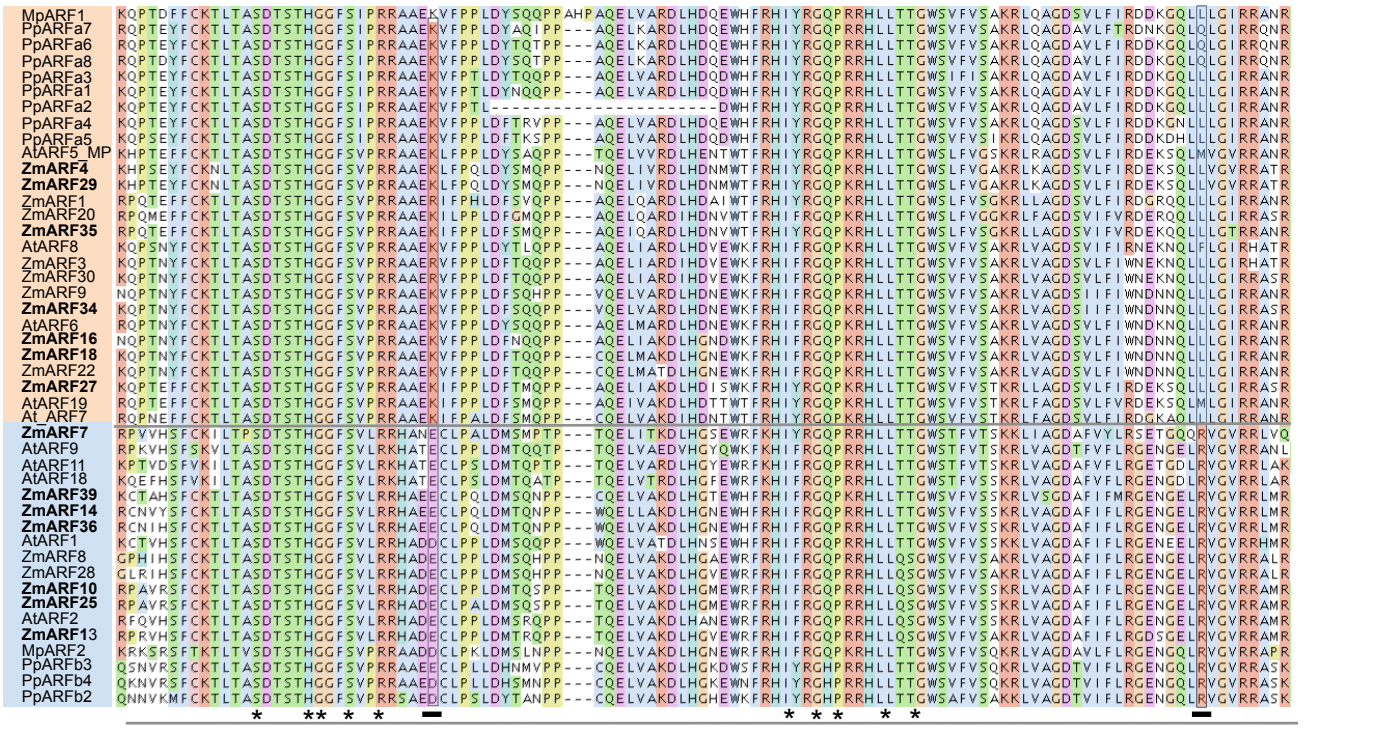

**Supplementary Figure 8. Conservation of ARF DNA binding domain. a,b.** Amino acid alignment of the extended DNA binding domains of maize (Zm), Arabidopsis (At), Physcomitrella (Pp), and Marchantia (Mp) ARFs. Flanking domain and dimerization regions correspond to those described in Boer et al., 2014 <sup>1</sup> and Guilfoyle 2015 <sup>2</sup>. Asterisks in the B3 DBD region indicate DNA contacting residues described for AtARF1 by Boer et al., 2014 <sup>1</sup>. Asterisks in the flanking and dimerization domain indicate conserved residues at the dimer interface. Amino acids conserved in all four species for either clade A or clade B ARFs are indicated by a small black bar.



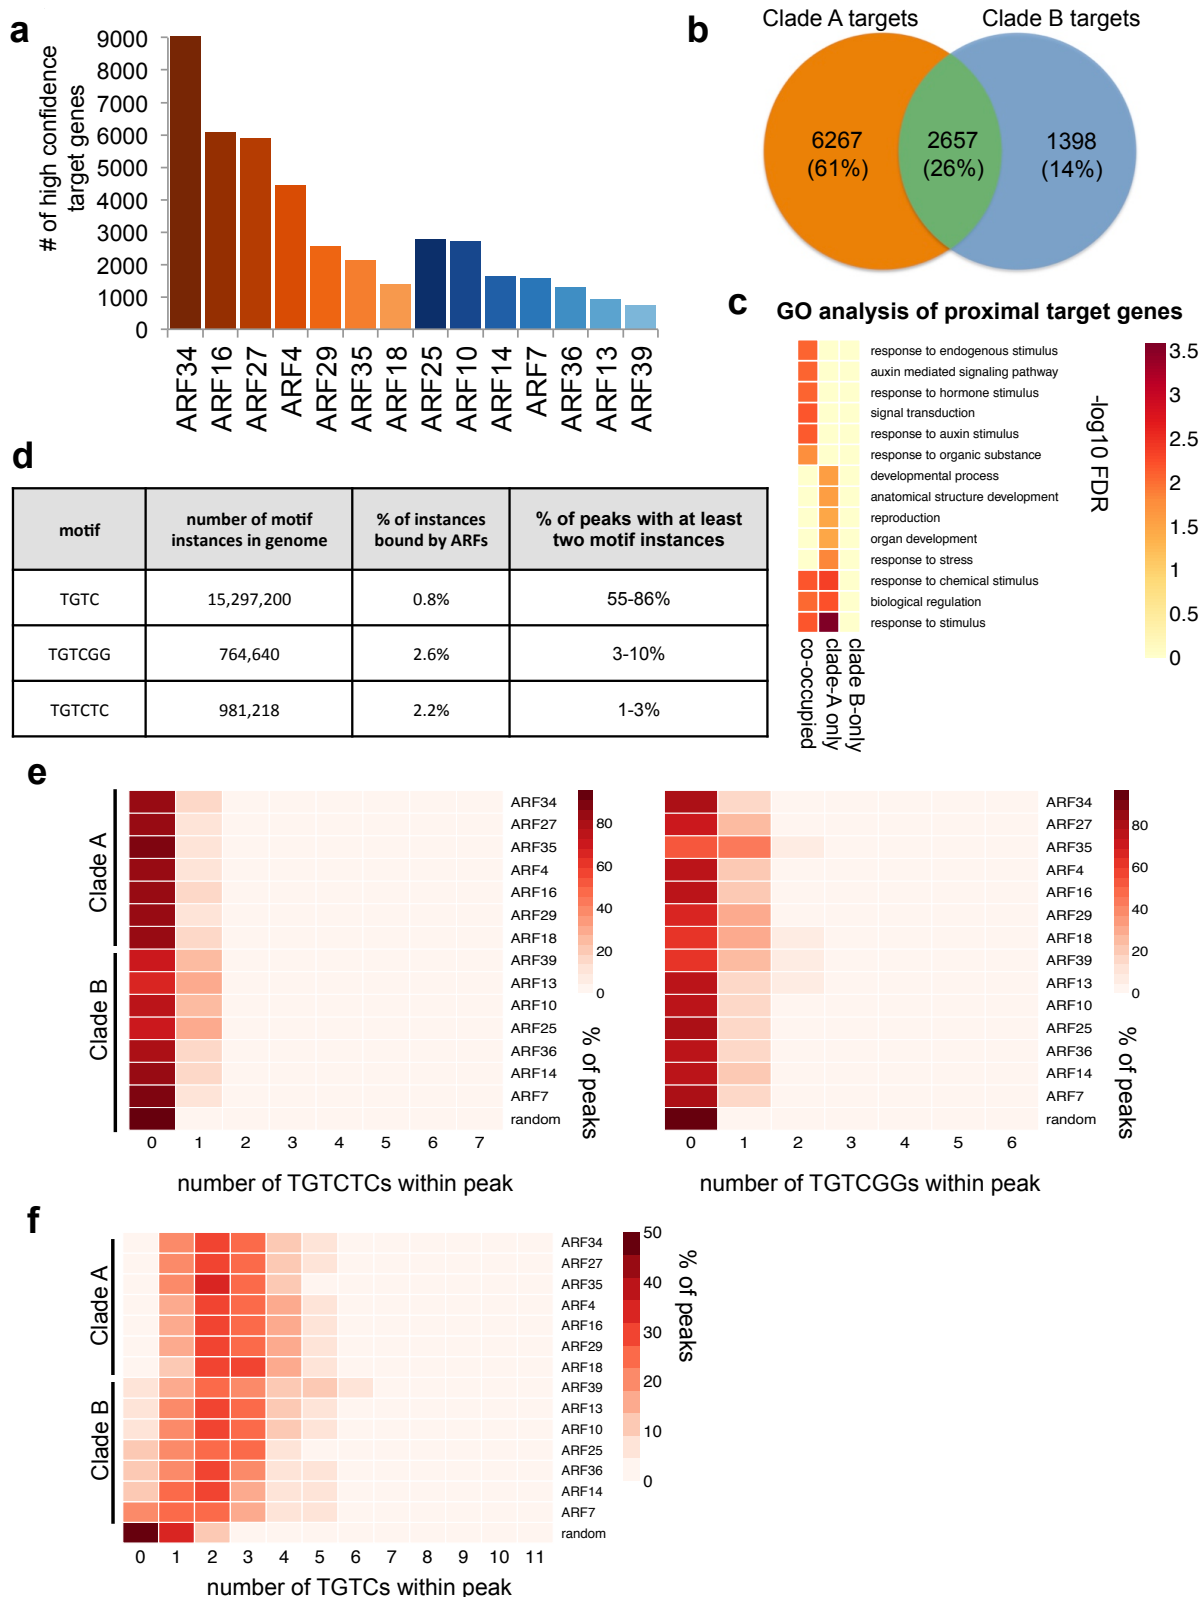

**Supplementary Figure 9. ARF target genes contain TGTC repeats.** **a.** Number of high confidence proximal target genes for each ARF. **b.** Venn diagram showing overlap among clade A and clade B high confidence proximal target genes. **c.** GO analysis of high confidence proximal target genes of clade-A only, clade B-only, and co-occupied loci. **d.** Table showing the frequency of TGTC containing sequence instances in the genome and the total percentage that are bound by ARFs. **e.** Heatmap showing the percentage of ARF peaks containing the indicated number of TGTCTC or TGTCGG motifs. **f.** Heatmap showing the percentage of ARF peaks containing TGTC.

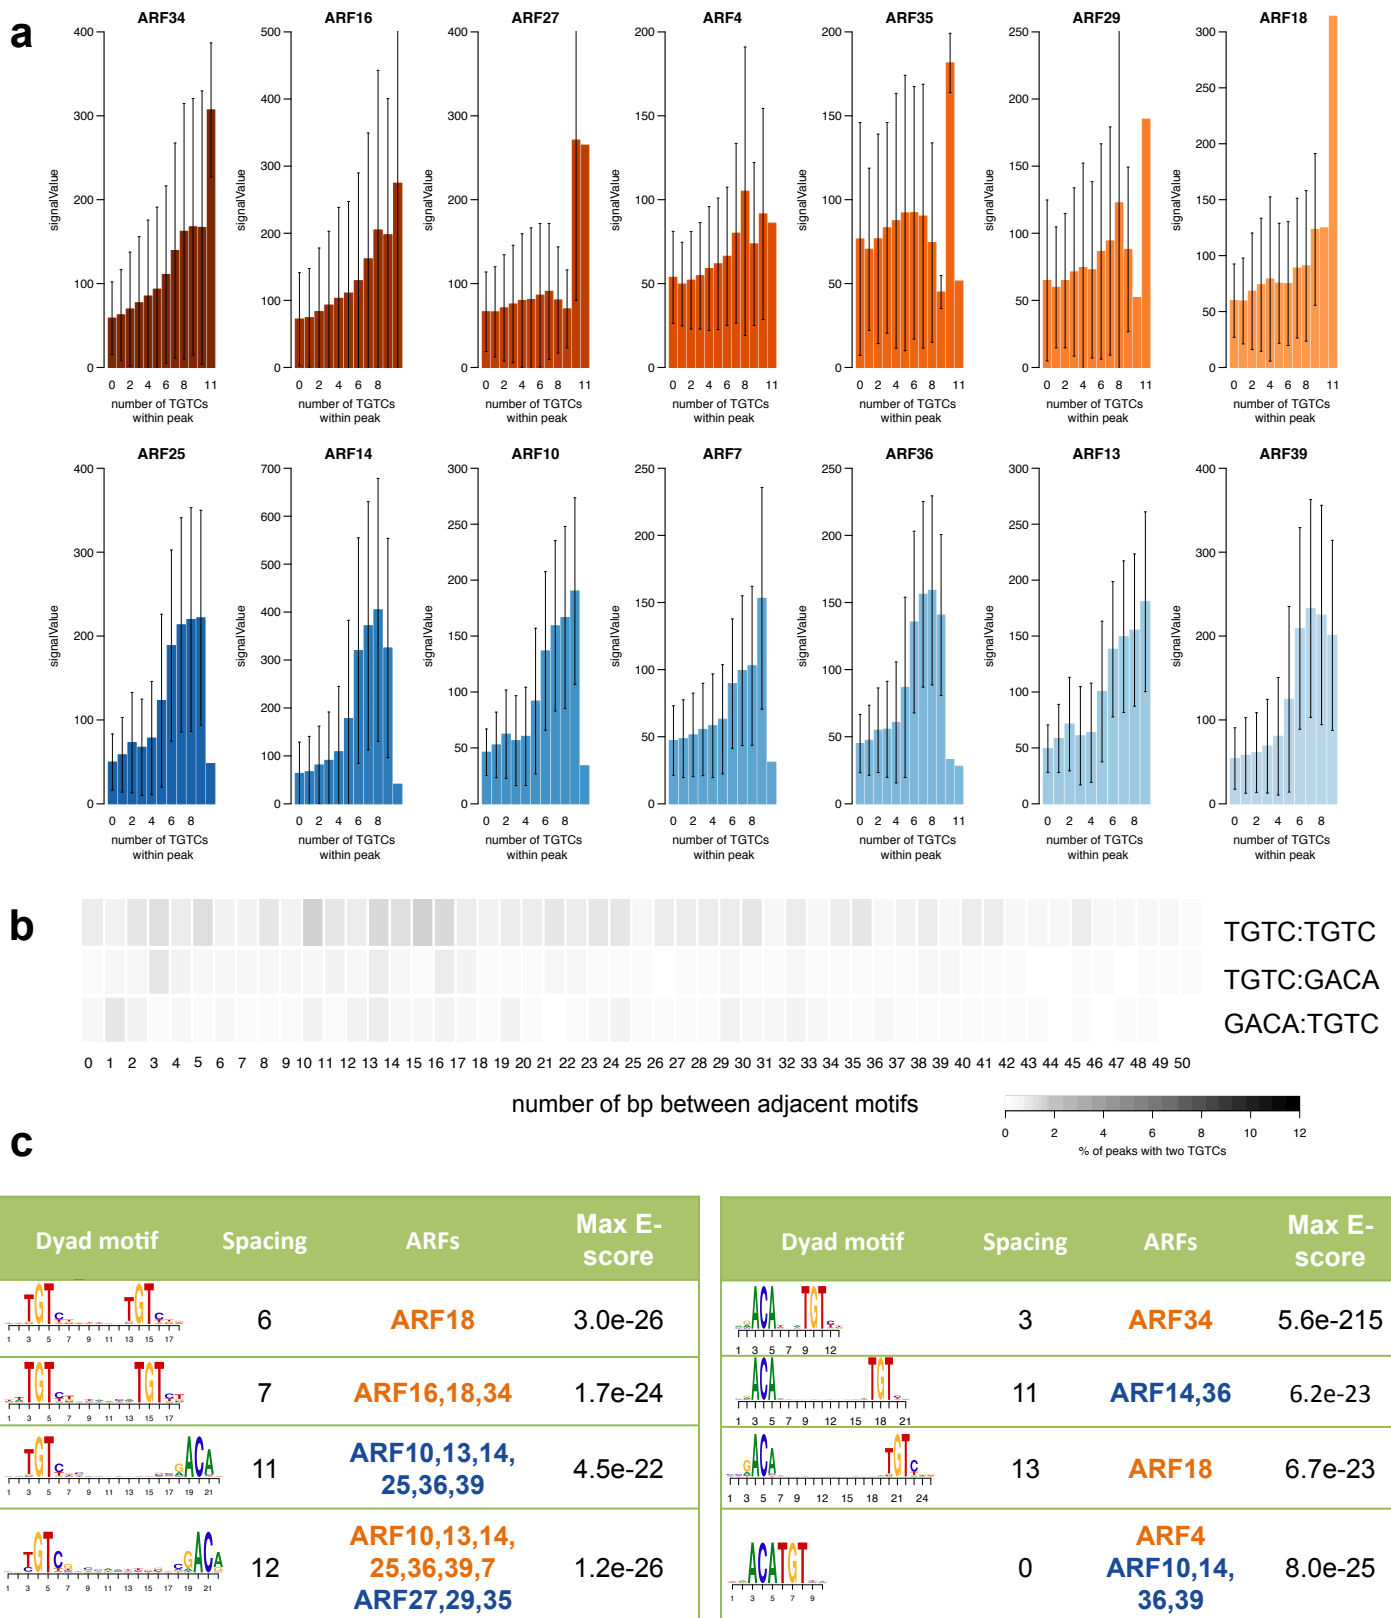

**Supplementary Figure 10. ARF peak strength correlates to the number of TGTC elements.** **a.** Average peak signal intensity for peaks containing different numbers of TGTCs. Error bars show standard deviation. **b.** Percentage of 4000 randomly selected genomic regions containing two adjacent TGTCs in the TGTC: TGTC, TGTC: GACA, or GACA: TGTC orientation that contain the indicated number of nucleotides separating adjacent motifs. **c.** Spaced pairs of TGTG repeats identified in ARF datasets using *de novo* dyad motif discovery analysis.

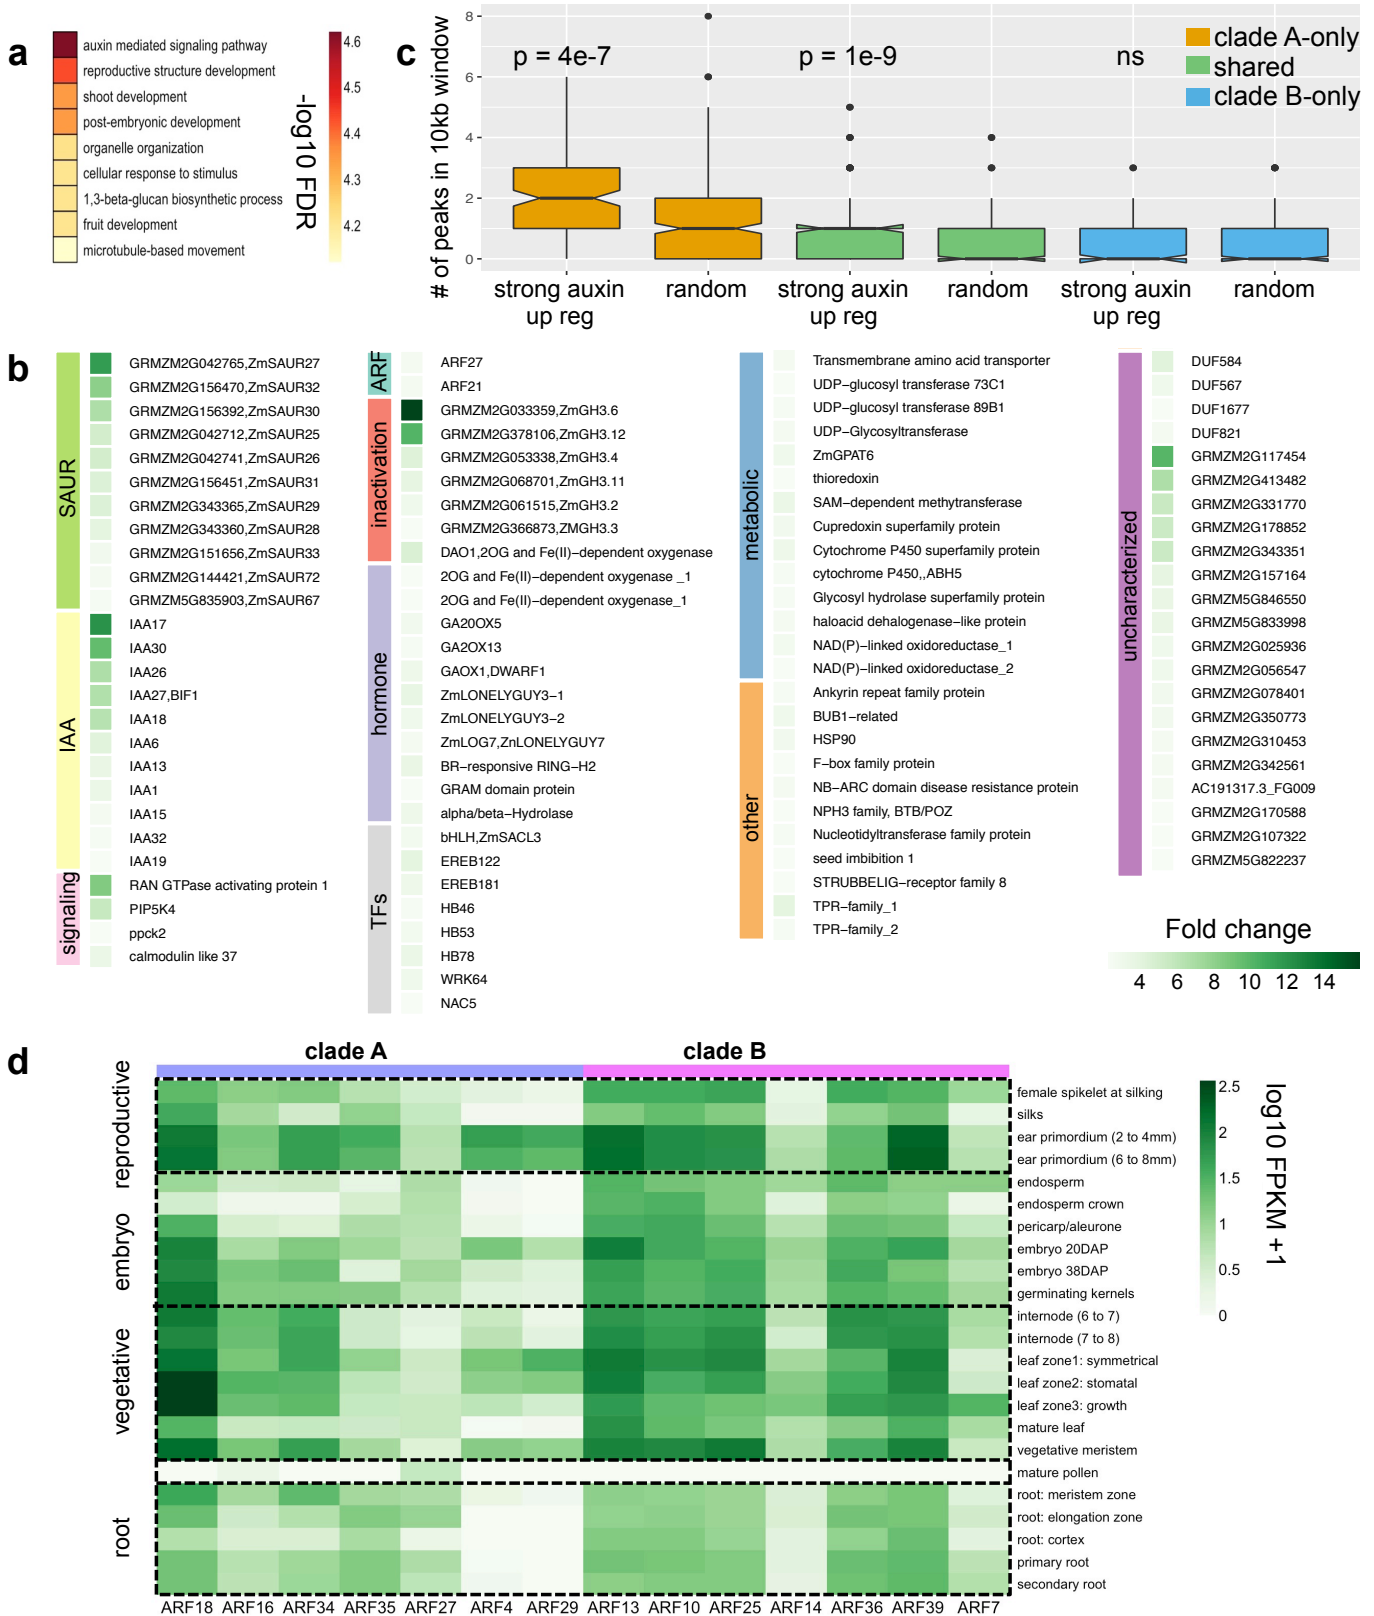

**Supplementary Figure 11. Auxin induced gene analysis.** **a.** GO enrichment analysis of auxin induced genes. **b.** Gene names and functional categories of the top 100 auxin induced genes. **c.** Distribution of the number of peaks located within 10kb of auxin induced or randomly selected ( $n=350$ ) genes according to clade A-only, clade B-only, or shared peak categories.  $p$ -values determined by two-sided  $t$ -test; ns, not significant; central line shows median, upper and lower hinges show first and third quartiles, notches show 95% confidence intervals. **d.** *ARF* genes show a broad range of expression across various tissues. Normalized FPKM RNA-seq data from Walley et al. 2016<sup>3</sup>.

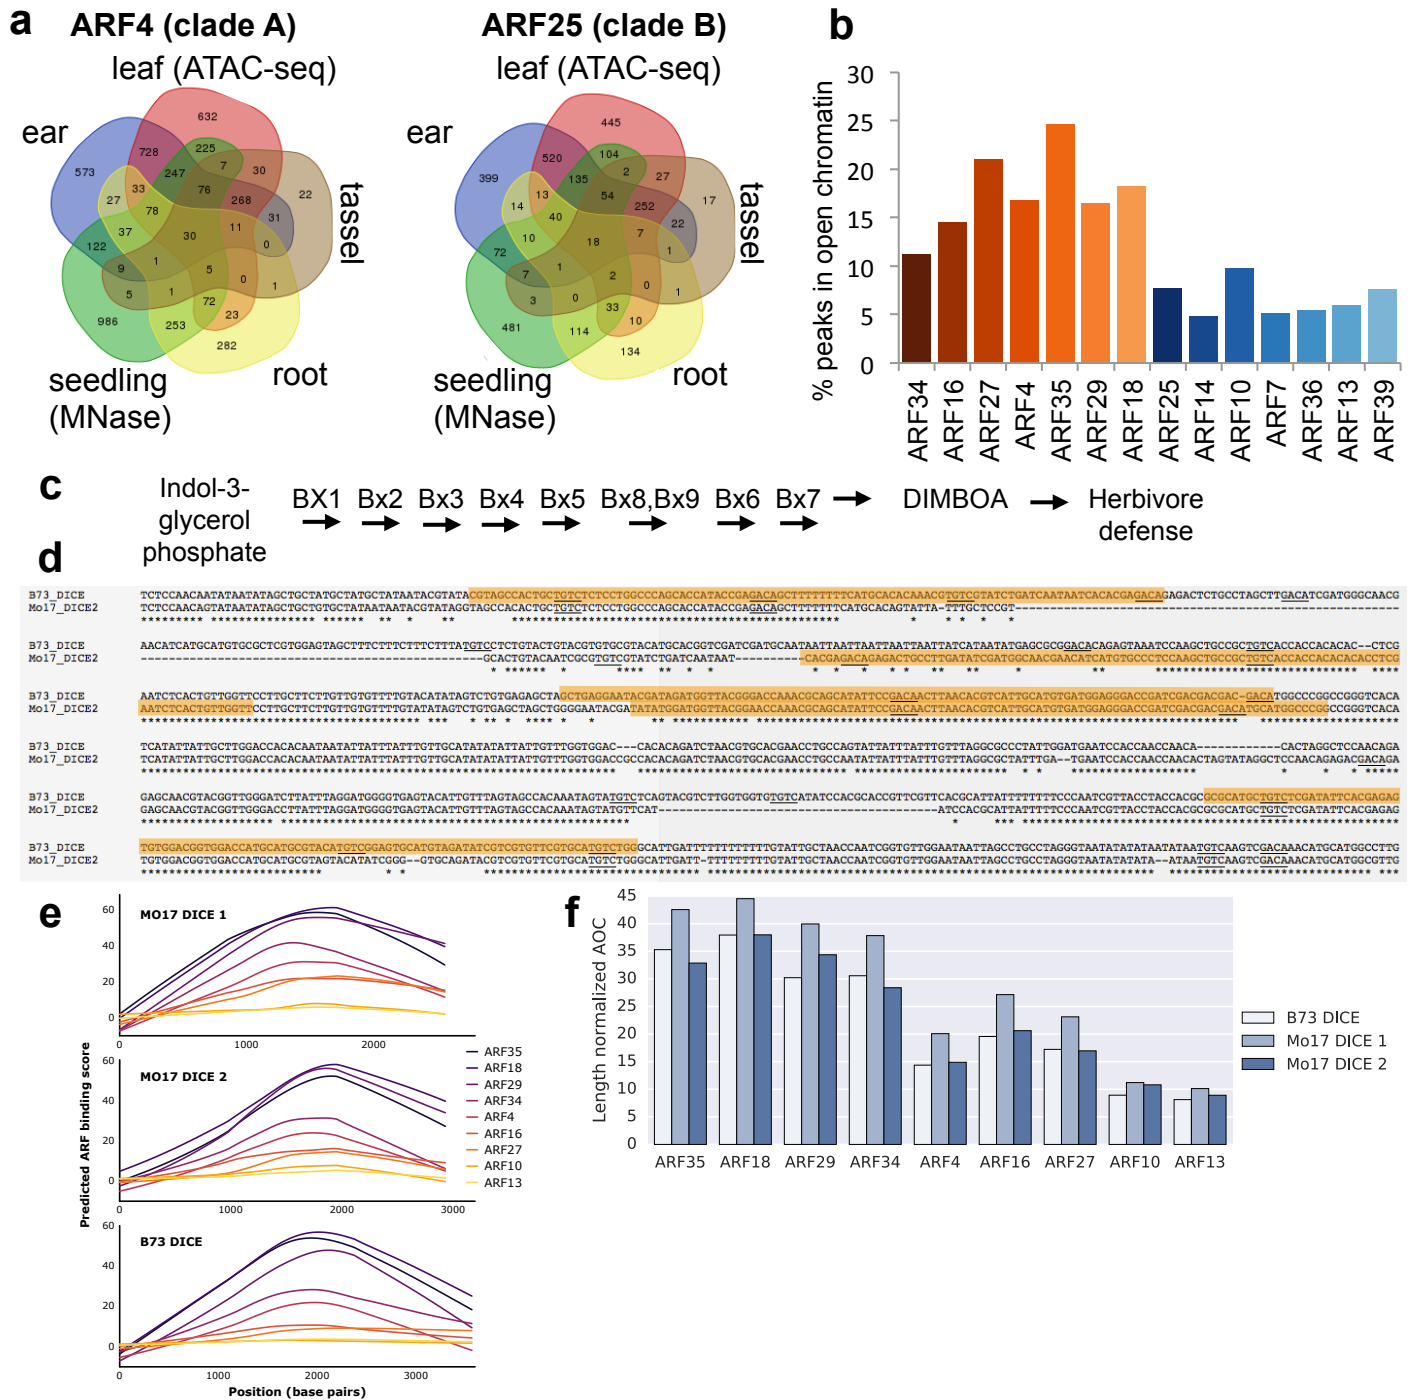

**Supplementary Figure 12. ARFs bind to open chromatin regions of QTLs for domestication and herbivore resistance.** **a.** Venn diagrams showing the number of ARF4 and ARF25 peaks that overlapped with regions of open chromatin from different tissues. **b.** Percentage of ARF peaks residing in regions of open chromatin from at least one of four different tissues (root, tassel, ear, and leaf). **c.** Schematic of DIMBOA biosynthesis pathway. **d.** Alignment of B73 DICE and Mo17 DICE 2 sequences surrounding the three ARF peaks. Orange highlighted regions show 100bp regions surrounding empirically determined peak summit. TGTC instances are underlined. Putative TGTC binding motifs in the Mo17 DICE2 region are partially conserved suggesting that ARF binding may play a role in the increased herbivore resistance of Mo17. **e.** Binding score predictions for individual ARFs in the DICE elements. **f.** Binding potential of individual ARFs to the B73 DICE, the Mo17 DICE1 and Mo17 DICE2 elements measured as the area under the curve (AOC) of binding scores within the ~4kb DICE elements. Values were normalized by length to account for the slightly different sizes of sequences between the different elements.

**Supplementary Table 1.** Table showing metrics for the 26 ARFs tested by DAP-seq. ARFs passing quality control threshold are in bold.

| ZmARF        | geneID               | %RiP | # peaks | # target genes | # unique peaks | % of peaks that are unique | clade | sub-clade | % of ARF dataset that is subclade specific |
|--------------|----------------------|------|---------|----------------|----------------|----------------------------|-------|-----------|--------------------------------------------|
| <b>ARF34</b> | <b>GRMZM2G081158</b> | 18   | 74686   | 9200           | 23786          | 32%                        | A     | 34/16/18  | 14%                                        |
| <b>ARF16</b> | <b>GRMZM2G028980</b> | 12   | 42142   | 6081           | 1746           | 4%                         | A     | 34/16/18  | 25%                                        |
| <b>ARF27</b> | <b>GRMZM2G160005</b> | 8    | 30731   | 5888           | 2378           | 8%                         | A     | 27/35     | 0.4%                                       |
| <b>ARF4</b>  | <b>GRMZM2G034840</b> | 7    | 28732   | 4447           | 3786           | 13%                        | A     | 4/29      | 2%                                         |
| <b>ARF29</b> | <b>GRMZM2G086949</b> | 3    | 14201   | 2573           | 486            | 3%                         | A     | 4/29      | 4%                                         |
| <b>ARF35</b> | <b>GRMZM2G317900</b> | 2    | 9262    | 2139           | 342            | 4%                         | A     | 27/35     | 1%                                         |
| <b>ARF18</b> | <b>GRMZM2G035405</b> | 2    | 7544    | 1386           | 45             | 1%                         | A     | 34/16/18  | 5%                                         |
| ARF9         | GRMZM2G073750        | 0.6  | 2783    | NA             | NA             | NA                         | A     | NA        | NA                                         |
| ARF3         | GRMZM2G078274        | 0.1  | 1122    | NA             | NA             | NA                         | A     | NA        | NA                                         |
| ARF22        | GRMZM2G089640        | 0.1  | 303     | NA             | NA             | NA                         | A     | NA        | NA                                         |
| ARF30        | GRMZM2G475882        | 0    | 89      | NA             | NA             | NA                         | A     | NA        | NA                                         |
| ARF1         | GRMZM2G169820        | 0    | 21      | NA             | NA             | NA                         | A     | NA        | NA                                         |
| <b>ARF25</b> | <b>GRMZM2G116557</b> | 17   | 38315   | 2789           | 5732           | 15%                        | B     | 10/13/25  | 18%                                        |
| <b>ARF14</b> | <b>GRMZM2G137413</b> | 16   | 28098   | 1640           | 2550           | 9%                         | B     | 14/36/39  | 4%                                         |
| <b>ARF7</b>  | <b>GRMZM2G475263</b> | 11   | 29393   | 1561           | 8120           | 28%                        | B     | 7         | 29%                                        |
| <b>ARF10</b> | <b>GRMZM2G338259</b> | 10   | 33565   | 2711           | 2332           | 7%                         | B     | 10/13/25  | 19%                                        |
| <b>ARF36</b> | <b>GRMZM2G702026</b> | 9    | 21673   | 1288           | 772            | 4%                         | B     | 14/36/39  | 5%                                         |
| <b>ARF13</b> | <b>GRMZM2G378580</b> | 5    | 18360   | 913            | 164            | 1%                         | B     | 10/13/25  | 19%                                        |
| <b>ARF39</b> | <b>GRMZM2G017187</b> | 5    | 10196   | 747            | 46             | 0.5%                       | B     | 14/36/39  | 1%                                         |
| ARF28        | GRMZM2G006042        | 0.7  | 2699    | NA             | NA             | NA                         | B     | NA        | NA                                         |
| ARF12        | GRMZM2G437460        | 0.5  | 1374    | NA             | NA             | NA                         | B     | NA        | NA                                         |
| ARF8         | GRMZM2G352159        | 0    | 0       | NA             | NA             | NA                         | B     | NA        | NA                                         |
| ARF23        | GRMZM2G441325        | 0    | 22      | NA             | NA             | NA                         | C     | NA        | NA                                         |
| ARF19        | AC207656.3_FG002     | 0    | 22      | NA             | NA             | NA                         | C     | NA        | NA                                         |
| ARF5         | GRMZM5G808366        | 0    | 0       | NA             | NA             | NA                         | C     | NA        | NA                                         |
| ARF21        | GRMZM2G390641        | 0    | 0       | NA             | NA             | NA                         | C     | NA        | NA                                         |

**Supplementary Table 2.** List of primers used in this study.

| ARF   | geneID        | Forward primer                                            | Reverse primer                                                 |
|-------|---------------|-----------------------------------------------------------|----------------------------------------------------------------|
| ARF10 | GRMZM2G338259 | 5'GAATTCGGCCGTCAAGGCCAATG<br><b>CCGCCCAGCAACAGCCAT</b>    | 5'AGTCGACGGCCCATGAGGCCCTC<br><b>GTTTGTGGCGGCGGCGCAA</b>        |
| ARF12 | GRMZM2G437460 | 5'GAATTCGGCCGTCAAGGCCA<br><b>ATGGCGGGCATCGACCTCAACACC</b> | 5'AGTCGACGGCCCATGAGGCCCTTA<br><b>CATATCTGTGCGCCGAGACGTCAAC</b> |
| ARF13 | GRMZM2G378580 | 5'GAATTCGGCCGTCAAGGCCAATG<br><b>ACTTCTTCGGCGGCGG</b>      | 5'AGTCGACGGCCCATGAGGCCGCA<br><b>GTTGTCGGAGTAAGCGAC</b>         |
| ARF39 | GRMZM2G017187 | 5'GAATTCGGCCGTCAAGGCCAATG<br><b>GACGCGCCCAACCCTGG</b>     | 5'AGTCGACGGCCCATGAGGCCCTTC<br><b>AGACAGTGAGTTCGCAGC</b>        |



**Supplementary Table 3.** List of blacklisted sites with corresponding genomic coordinates (B73v3).

| chromosome | start     | end       |
|------------|-----------|-----------|
| 1          | 234020    | 236940    |
| 1          | 8181420   | 8187000   |
| 1          | 18811180  | 18811780  |
| 1          | 23795660  | 23801280  |
| 1          | 24792560  | 24793320  |
| 1          | 25691580  | 25698100  |
| 1          | 188365200 | 188367240 |
| 1          | 203922040 | 203972020 |
| 1          | 234523860 | 234799180 |
| 1          | 247071880 | 247073040 |
| 1          | 277631740 | 277636580 |
| 1          | 281069480 | 281073800 |
| 1          | 288460640 | 288522680 |
| 2          | 7876796   | 7879820   |
| 2          | 65623040  | 65634920  |
| 2          | 78451820  | 78533960  |
| 2          | 172722480 | 172728660 |
| 2          | 172753000 | 172758620 |
| 2          | 174735560 | 174738860 |
| 2          | 229751620 | 229788080 |
| 3          | 29367300  | 29370920  |
| 3          | 50972180  | 50973720  |
| 3          | 50972507  | 50973820  |
| 3          | 74665400  | 74669220  |
| 3          | 81184180  | 81201060  |
| 3          | 165555760 | 165557740 |
| 3          | 215294200 | 215294520 |
| 4          | 74593940  | 74598580  |
| 4          | 85001080  | 85001840  |
| 4          | 111648720 | 111735480 |
| 4          | 123491547 | 123515060 |
| 4          | 156783640 | 156803120 |
| 4          | 156978620 | 157019540 |
| 4          | 172406460 | 172456480 |
| 4          | 208416120 | 208416460 |
| 5          | 21523600  | 21527900  |
| 5          | 147741620 | 147742880 |
| 5          | 189292040 | 189293760 |
| 5          | 209989400 | 210066300 |
| 6          | 51095820  | 51108200  |
| 6          | 51591260  | 51601900  |
| 6          | 68902720  | 68903380  |
| 6          | 159151460 | 159151960 |
| 6          | 160952600 | 160983300 |
| 7          | 37451180  | 37456540  |
| 7          | 44740920  | 44744580  |
| 7          | 63569200  | 63570020  |
| 7          | 129594460 | 129670380 |
| 8          | 17386620  | 17387060  |
| 8          | 135509580 | 135512680 |
| 8          | 145996600 | 145997200 |
| 8          | 155678640 | 155702560 |
| 8          | 175341900 | 175345520 |
| 9          | 1         | 123900    |
| 9          | 6936360   | 6968600   |
| 9          | 28874200  | 28875280  |
| 9          | 58974640  | 59006800  |
| 9          | 68987360  | 69066640  |
| 9          | 68987680  | 69065480  |
| 9          | 69842480  | 69848160  |
| 9          | 73732140  | 74000800  |
| 9          | 88177100  | 88204100  |
| 9          | 132009360 | 132010480 |
| 10         | 121020780 | 121028520 |

## Supplementary References

1. Boer, D. R. *et al.* Structural basis for DNA binding specificity by the auxin-dependent ARF transcription factors. *Cell* **156**, 577–589 (2014).
2. Guilfoyle, T. J. The PB1 Domain in Auxin Response Factor and Aux/IAA Proteins: A Versatile Protein Interaction Module in the Auxin Response. *Plant Cell Online* **27**, 33–43 (2015).
3. Walley, J. W. *et al.* Integration of omic networks in a developmental atlas of maize. *Science* **353**, 814–8 (2016).
